# Supplementary material for: CO2 reforming of CH4 over Ni/mesostructured silica nanoparticles (Ni/MSN)
Source: Royal Society of Chemistry journal article supplement (doi:10.1039/c5ra04320d), 2015-01-01
Supplement: c5ra04320d1.pdf [file c5ra04320d1.pdf]

# Supplementary Information

## CO<sub>2</sub> reforming of CH<sub>4</sub> over Ni/Mesostructured Silica Nanoparticles (MSN)

S. M. Sidik,<sup>a</sup> A. A. Jalil,<sup>a,b\*</sup> S. Triwahyono,<sup>c</sup> T. A. T. Abdullah,<sup>a,b</sup> and A. Ripin,<sup>a,b</sup>

<sup>a</sup>*Department of Chemical Engineering, Faculty of Chemical Engineering, Universiti Teknologi Malaysia, 81310 UTM Johor Bahru, Johor, Malaysia*

<sup>b</sup>*Institute of Hydrogen Economy, Universiti Teknologi Malaysia, 81310 UTM Johor Bahru, Johor, Malaysia.*

<sup>c</sup>*Department of Chemistry, Faculty of Science, Universiti Teknologi Malaysia, 81310 UTM Johor Bahru, Johor, Malaysia*

### Corresponding author:

Aishah Abdul Jalil (PhD)

Tel: +60-7-5535581 Fax: +60-7-5588166

Email: [aishah@cheme.utm.my](mailto:aishah@cheme.utm.my)

**Table S1** Time required for electrolysis and the exact amount of Ni loading onto MSN and MCM-41 as detected by MP-AES and EDX.

| Catalysts | <sup>a</sup> Time for electrolysis<br>[min] | <sup>b</sup> Ni detected in catalyst<br>[%] | <sup>c</sup> Ni on the surface<br>[mass %] |
|-----------|---------------------------------------------|---------------------------------------------|--------------------------------------------|
| Ni/MSN    | 3.49                                        | 1.99                                        | 1.91                                       |
| Ni/MCM-41 | 3.49                                        | 1.98                                        | 1.61                                       |

<sup>a</sup> Calculated time for electrolysis based on Faraday's Law (Eq. 1).

<sup>b</sup> The detected Ni presence in the catalyst determined by MP-AES.

<sup>c</sup> The detected Ni distributed on the surface of the catalysts obtained from elemental analysis using EDX.

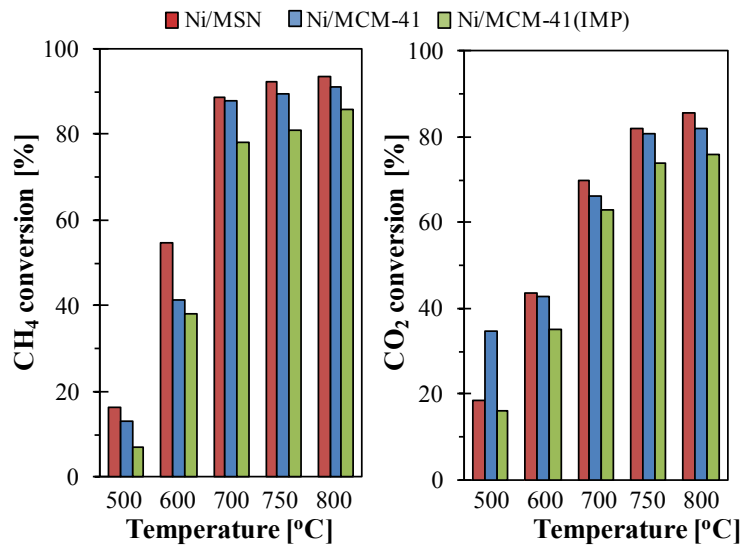

**Fig. S1** CH<sub>4</sub> and CO<sub>2</sub> conversions over Ni/MSN, Ni/MCM-41 and Ni/MCM-41 prepared by impregnation catalysts.

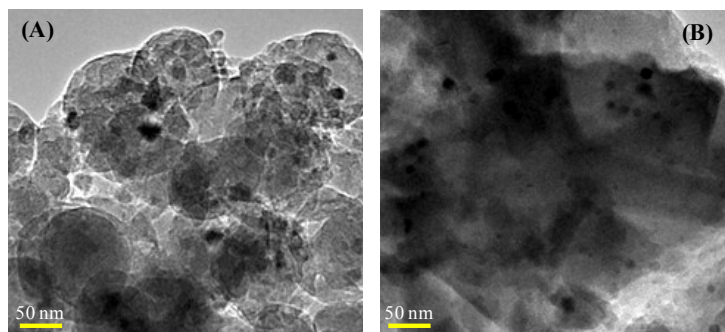

**Fig. S2** TEM images of (A) Ni/MSN and (B) Ni/MCM-41 after regeneration 750 °C with 30 min of air and 1 h of H<sub>2</sub>

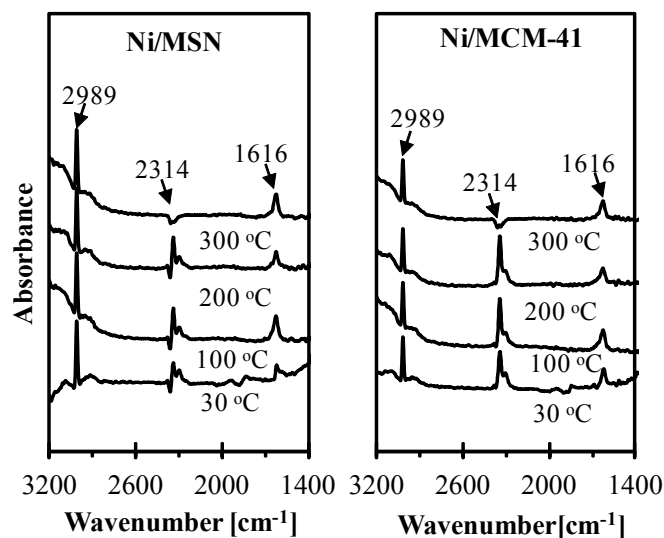

**Fig. S3** IR spectra of adsorbed CH<sub>4</sub> and CO<sub>2</sub> on activated Ni/MSN and Ni/MCM-41 when the catalyst were reduced and exposed to 30 Torr of CH<sub>4</sub> and CO<sub>2</sub> at room temperature followed by heating at elevated temperature from room temperature to 300 °C.

Probable mechanism of CO<sub>2</sub> reforming of CH<sub>4</sub> over the Ni/MSN and Ni/MCM-41 was studied using *in-situ* FTIR spectroscopy of adsorbed CH<sub>4</sub> and CO<sub>2</sub> which were recorded after reduction at 400 °C (Fig. S3). When Ni/MSN and Ni/MCM-41 were exposed to 30 Torr of CH<sub>4</sub> and CO<sub>2</sub>, intense bands attributable to gaseous CH<sub>4</sub> and CO<sub>2</sub> appeared at 2989 and 2314 cm<sup>-1</sup>, respectively. In addition, a band at 1616 cm<sup>-1</sup> corresponding to adsorbed bicarbonate, was also observed, suggesting the interaction of CO<sub>2</sub> with framework oxygen in the catalysts. Zhang et al. has evidenced that the IR bands of gas-phase CO (at 2170 and 2122 cm<sup>-1</sup>), which resulted from CO<sub>2</sub> reforming of CH<sub>4</sub> catalyzed by Ni/γ-Al<sub>2</sub>O<sub>3</sub> started to appear when the reaction temperature exceeded 400 °C.<sup>1</sup> In another study, Qian et al. observed the presence of CO at the higher temperature of 500 °C over Ni/SBA-15 and La-Ni/SBA-15.<sup>2</sup> In this study, neither gas-phase nor adsorbed CO bands were detected, because of the limitation of the instrument to perform at higher reaction temperatures (> 300 °C). However, the presence of adsorbed bicarbonate, after exposure to CH<sub>4</sub> and CO<sub>2</sub> at room temperature, suggested the occurrence of strong CO<sub>2</sub> adsorption. Qian et al. only reported the presence of adsorbed bicarbonate for La-Ni/SBA-15, whereas no bicarbonate detection was reported for Ni/SBA-15.<sup>2</sup> The increasing of temperatures up to 300 °C, the intensities of the above mentioned adsorbed species decreased. However, it is worth mentioning that the signal intensity for adsorbed bicarbonate with the Ni/MSN was relatively higher than that for Ni/MCM-41 at 300 °C, indicating the ability of Ni/MSN to adsorb CO<sub>2</sub> at higher temperatures (as evidenced by the rate of CO<sub>2</sub> conversion for Ni/MSN exceeding Ni/MCM-41; refer Fig. 8). It was, therefore, concluded that the nickel supported on MSN was more active than the MCM-41 in the present study.

1 Z. Zhang, X.E. Verykios, S.M. MacDonald, and S. Affrossman, *J. Phys. Chem.*, 1996, **100**, 744.

2 L. Qian, Z. Ma, Y. Ren, H. Shi, B. Yue, S. Feng, J. Shen, and S. Xie, *Fuel*, 2014, **22**, 47.
